# Supplementary material for: Facilitating Wastewater Purification through Progressive Thawing by Microwave: Responses of Microbial Communities
Source: MDPI journal article supplement (doi:10.3390/w15203664), 2023-10-19

# KEGG pathway annotation

## Cellular Processes

Transport and catabolism  
Cellular community – prokaryotes  
Cell growth and death  
Cell motility

## Environmental Information Processing

Signaling molecules and interaction  
Signal transduction  
Membrane transport

## Genetic Information Processing

Translation  
Transcription  
Replication and repair  
Folding, sorting and degradation

## Human Diseases

Substance dependence  
Neurodegenerative diseases  
Infectious diseases  
Immune diseases  
Endocrine and metabolic diseases  
Drug resistance  
Cardiovascular diseases  
Cancers

## Metabolism

Xenobiotics biodegradation and metabolism  
Nucleotide metabolism  
Metabolism of terpenoids and polyketides  
Metabolism of other amino acids  
Metabolism of cofactors and vitamins  
Lipid metabolism  
Glycan biosynthesis and metabolism  
Enzyme families  
Energy metabolism  
Carbohydrate metabolism  
Biosynthesis of other secondary metabolites  
Amino acid metabolism

## Organismal Systems

Nervous system  
Immune system  
Excretory system  
Environmental adaptation  
Endocrine system  
Digestive system  
Circulatory system  
Aging

## Unclassified

Viral protein family  
Poorly characterized  
Metabolism  
Genetic information processing  
Cellular processes and signaling

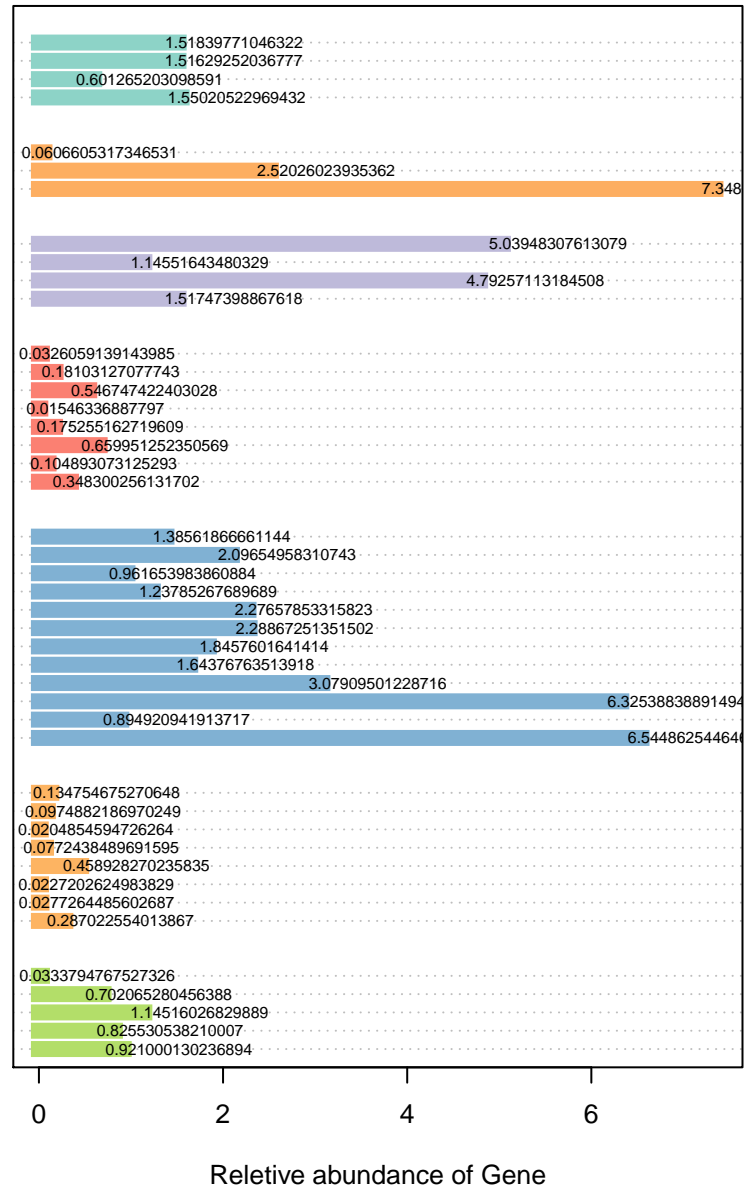

Supplement: s1 [file s1]
